# Supplementary material for: Synchronization of human retinal pigment epithelial-1 cells in mitosis
Source: J Cell Sci. 2020 Sep 17;133(18):jcs247940. doi: 10.1242/jcs.247940 (PMC7520456; doi:10.1242/jcs.247940)
Supplement: Supplementary information [file joces-133-247940-s1.pdf]

**Table S1.** Excel file listing the proteins identified by MS from the Ndc80 IP of RPE-1 cells synchronized in metaphase. Non-specific binding proteins were removed by filtering the Ndc80 dataset against the IgG dataset (see Materials and Methods).

[Click here to Download Table S1](#)

**Table S2.** Excel file showing the results of the GO enrichment analyses from the MS data of the Ndc80 IP shown in Table S1.

[Click here to Download Table S2](#)
